# Supplementary material for: Urinary metabolomics of young Italian autistic children supports abnormal tryptophan and purine metabolism
Source: Mol Autism. 2016 Nov 24;7:47. doi: 10.1186/s13229-016-0109-5 (PMC5121959; doi:10.1186/s13229-016-0109-5)
Supplement: Additional file 5: — Summary statistics. (XLSX 10 kb) [file 13229_2016_109_MOESM5_ESM.xlsx]

## Sheet: Foglio1
Summary statistics
Figure 4	Mean ASD	Mean ctrl	SD asd	SD ctrl	p value
Kynurenine	1.06109e+06	2.70781e+06	23704	17242	p=0.04595
quinolinate	3.4244e+06	1907661	38300	24196	p=0.00795
xanturenic acid	3698260	1303507	1445541	1041151	p=0.04121
melatonin	227080	1395959	854745	12111124	p=0.0327
indolyl lactate	1288788	126673	203254	111485	p=0.00091
indican	3692860	1803507	547854	145785	p=0.00094
indolyl 3 acetic acid	4753109	1768662	354785	241545	p=0.02126
5 hydroxyindolacetic acid	1185880	1743152	265454	194744	p=0.03338
serotonin	132545	157845	54784	41452	p=0.03239
kynurenic acid	132300	303009	19245	13545	p=0.03168
Figure 5	Mean ASD	Mean ctrl	SD asd	SD ctrl	p value
xanthosine	1634879	114839	443964	245019	p=0.00033
inosine	5.45606e+06	1.8626e+06	1344003	723763	p=0.00067
hypoxanthine	2.47965e+06	1.19664e+06	1.00248e+06	786487	p=0.04412
